# Supplementary material
Source: Research Square preprint supplement (doi:10.21203/rs.3.rs-9474810/v1)
Supplement: Supplementary file 1 [file b4b7933674fca63c2a023e9b.docx]

**Supporting Information**

**Title: Patterns of microbiome-mediated plant-soil feedback intensity in organic versus conventional farm soils**

Authors: Liang Cheng1, Connor Gibian-Lane1, Antonio DiTommaso1, and Jenny Kao-Kniffin1*

Affiliation: 1School of Integrative Plant Science, Cornell University, Ithaca, NY 14853

*Corresponding Author:

jtk57@cornell.edu

Submitted to: *Oecologia*

April 20, 2026

**Fig. S1.** Plant-soil feedback prediction accuracy using **(A, B)** Random Forest (RF) and **(C, D)** Support Vector Regression (SVR). Models are based on **(A, C)** unfiltered OTUs or **(B, D)** Pearson (P) correlation-filtered OTUs. See Table S1 for model performance metrics.

1. RF


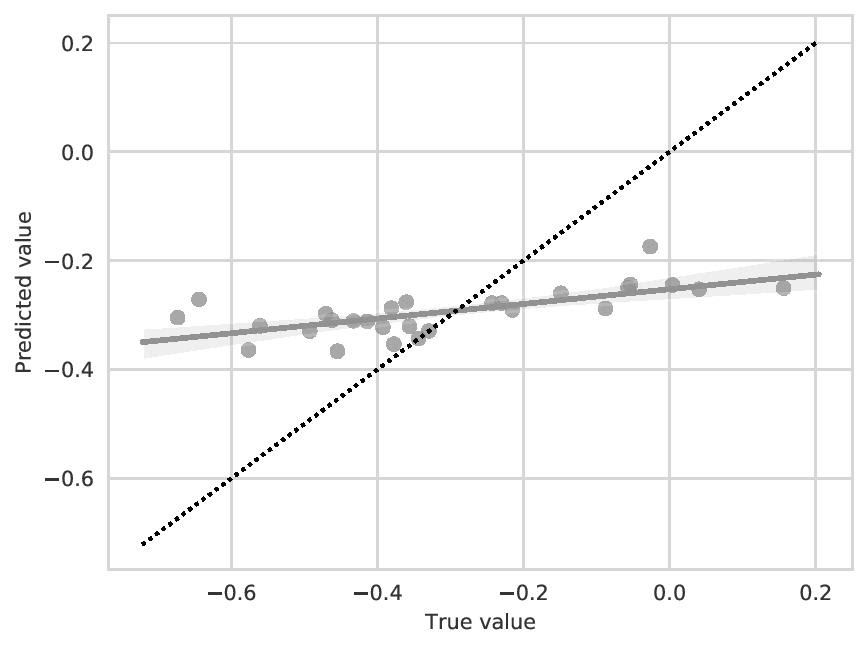


1. PRF


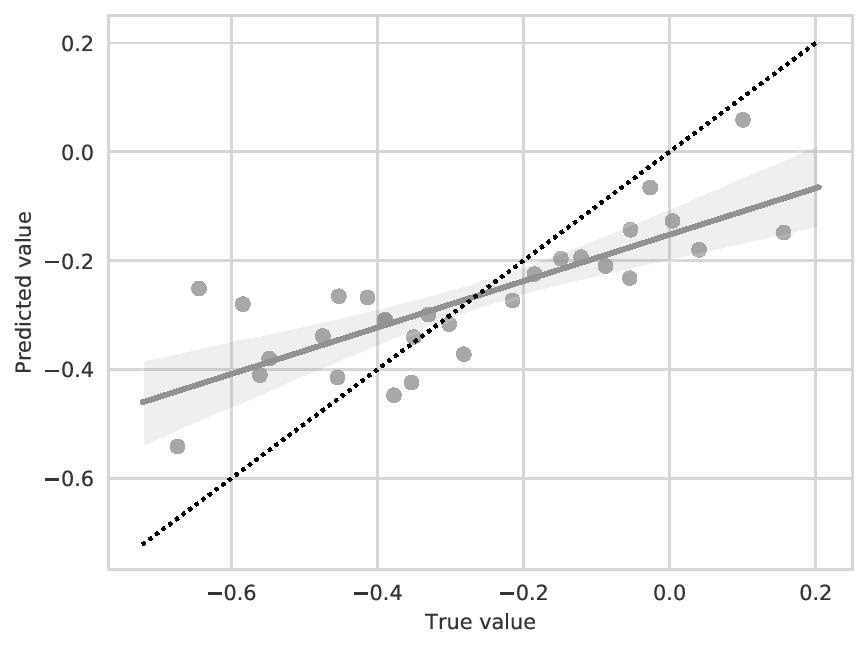


1. SVR


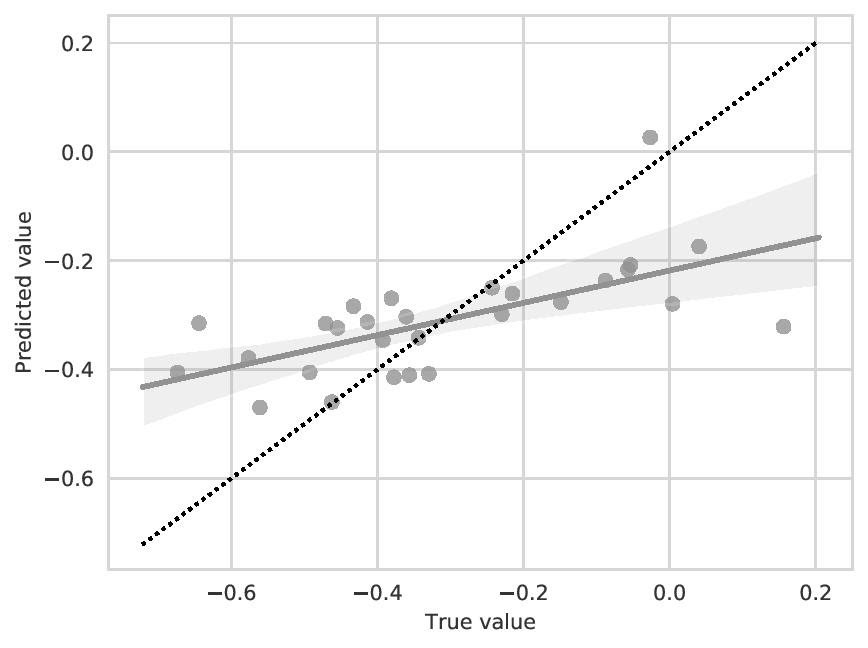


1. PSVR


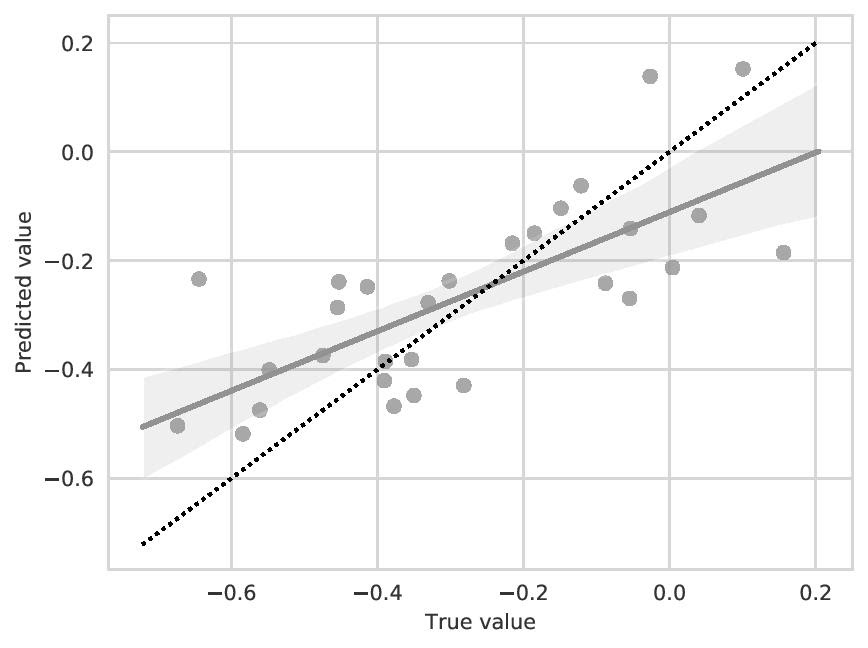


**Fig. S2.** Correlations between α-diversity metrics and PSF strength. These correlations are shown for the top 10% of OTUs associated with PSF (3,314 OTUs). Two α-diversity metrics, **(a, b)** Chao1and **(c, d)** observed OTUs, are presented for **(a, c)** organic farm samples and **(b, d)** conventional farm samples.

1. Organic systems

**
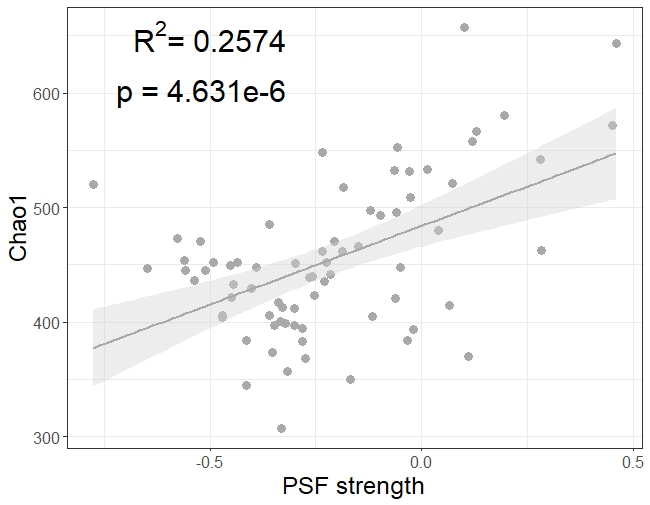
**

1. Conventional systems


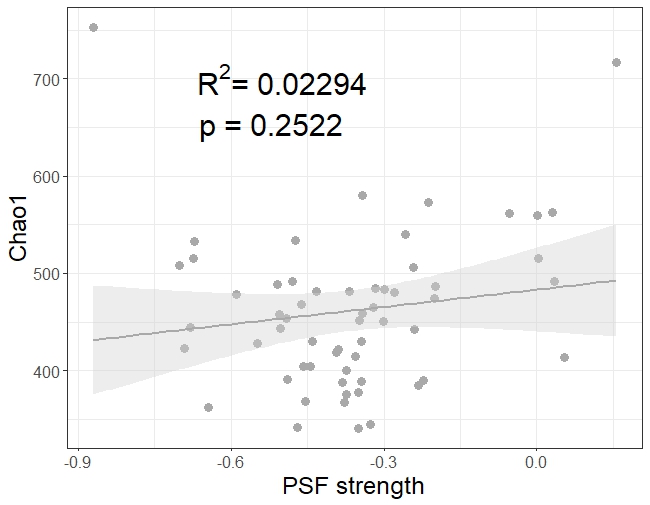


1. Organic systems

**
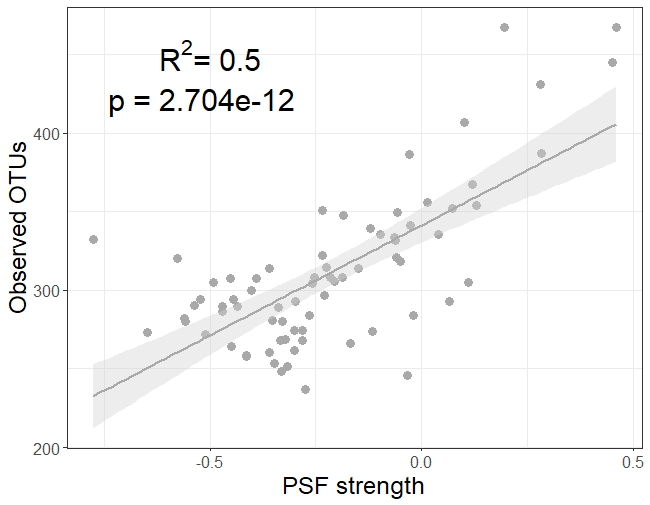
**

1. Conventional systems

**
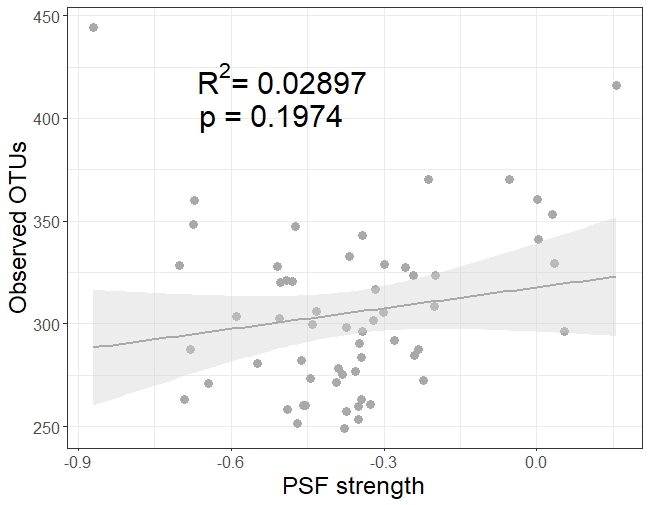
**

**Fig. S3.** Median, interquartile range, and 1.5 × interquartile range (with outliers) of **A)** Shannon, **B)** Chao1, and **C)** observed OTUs. These α-diversity metrics were calculated for the top 10% of OTUs correlated with PSF (3,314 OTUs). Samples were rarefied to 1800 observations and iterated ten times. Twelve samples with less than 1800 observations were excluded. This method resulted in a total of 132 samples (73 organic and 59 conventional).


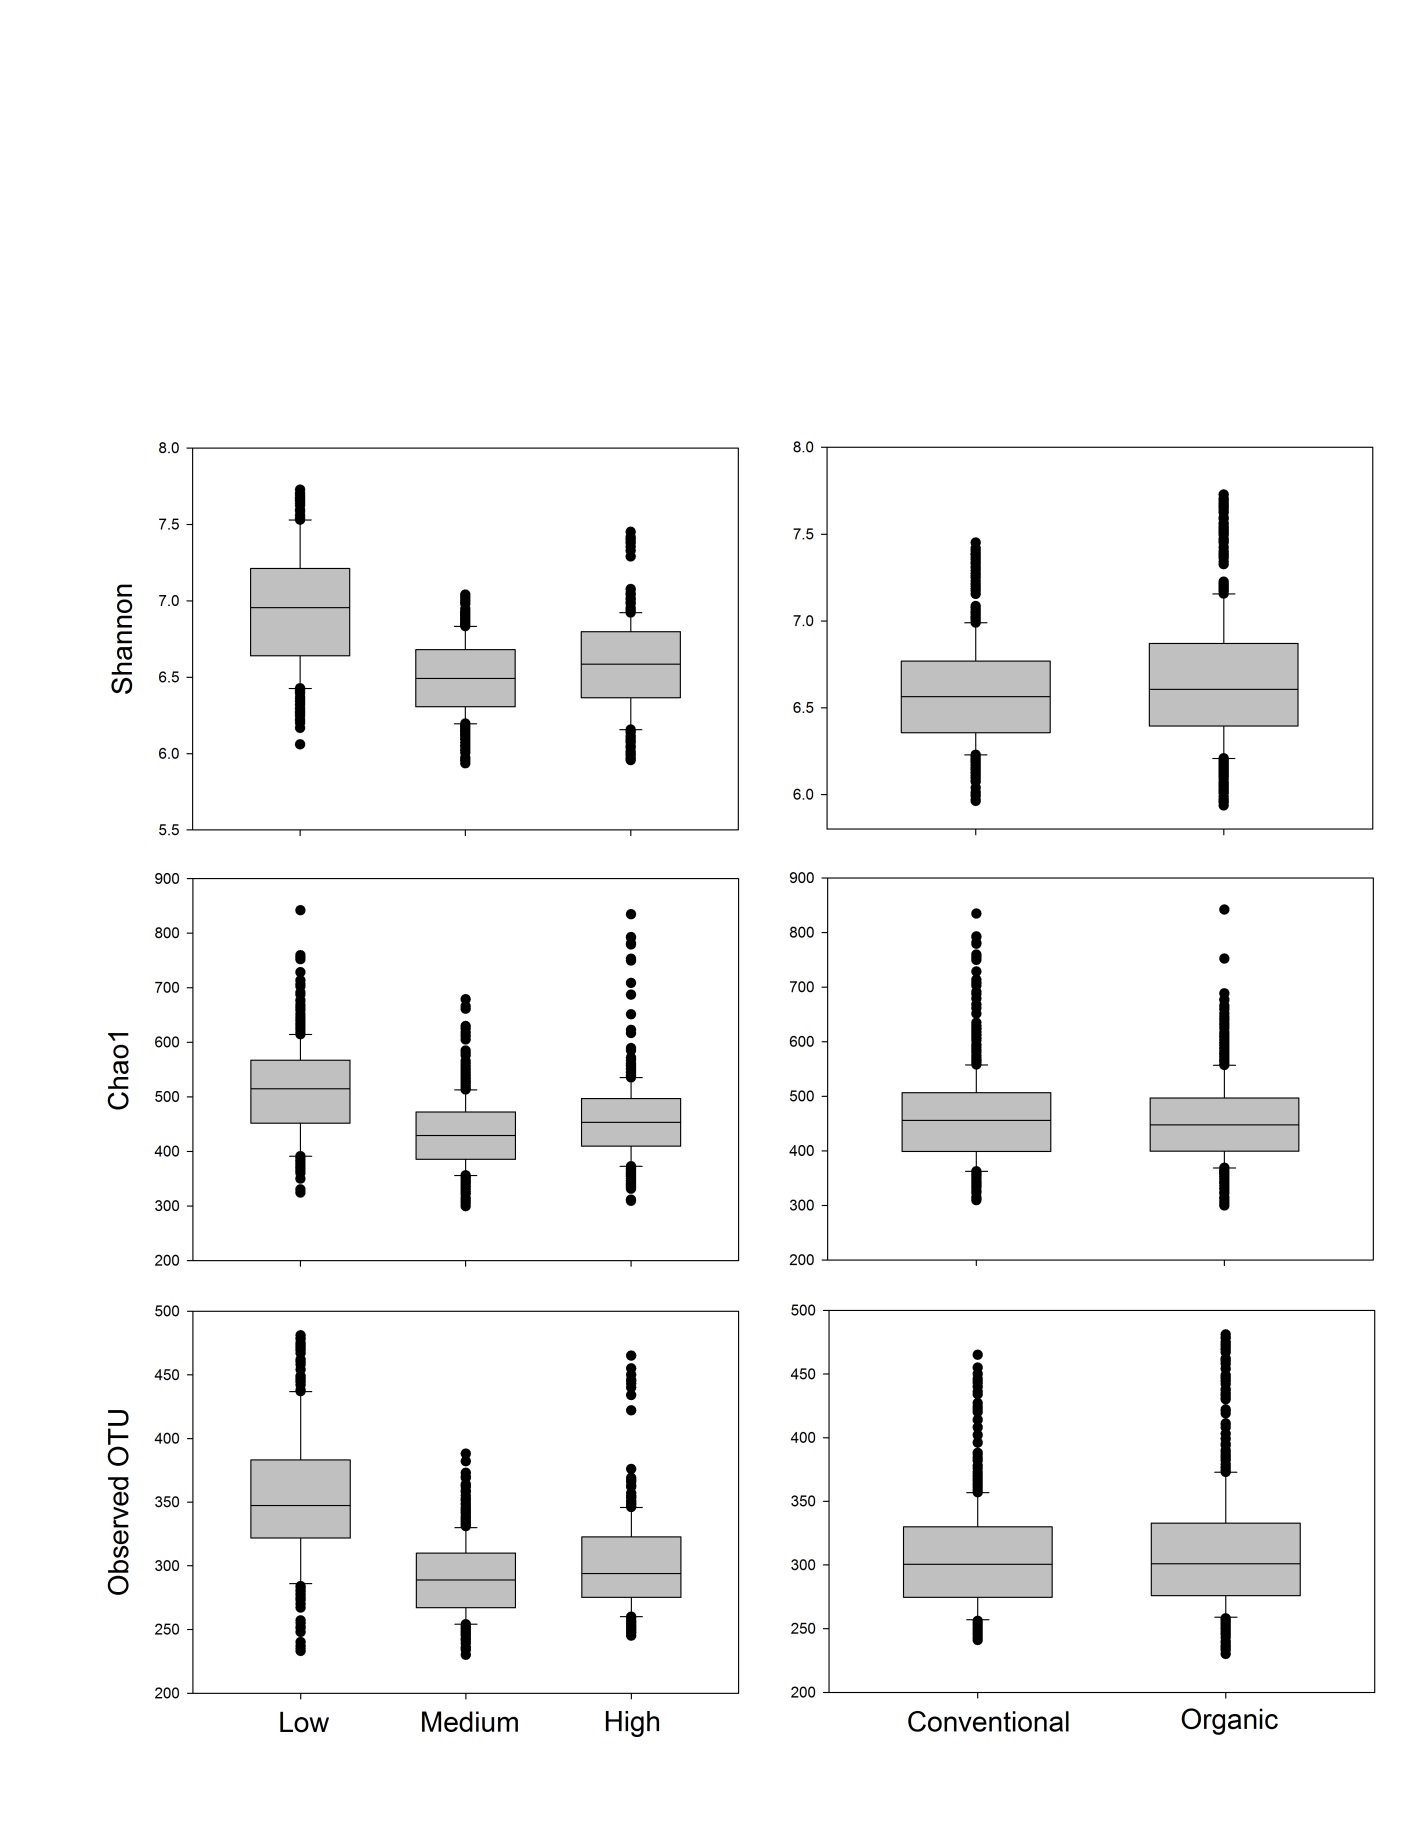

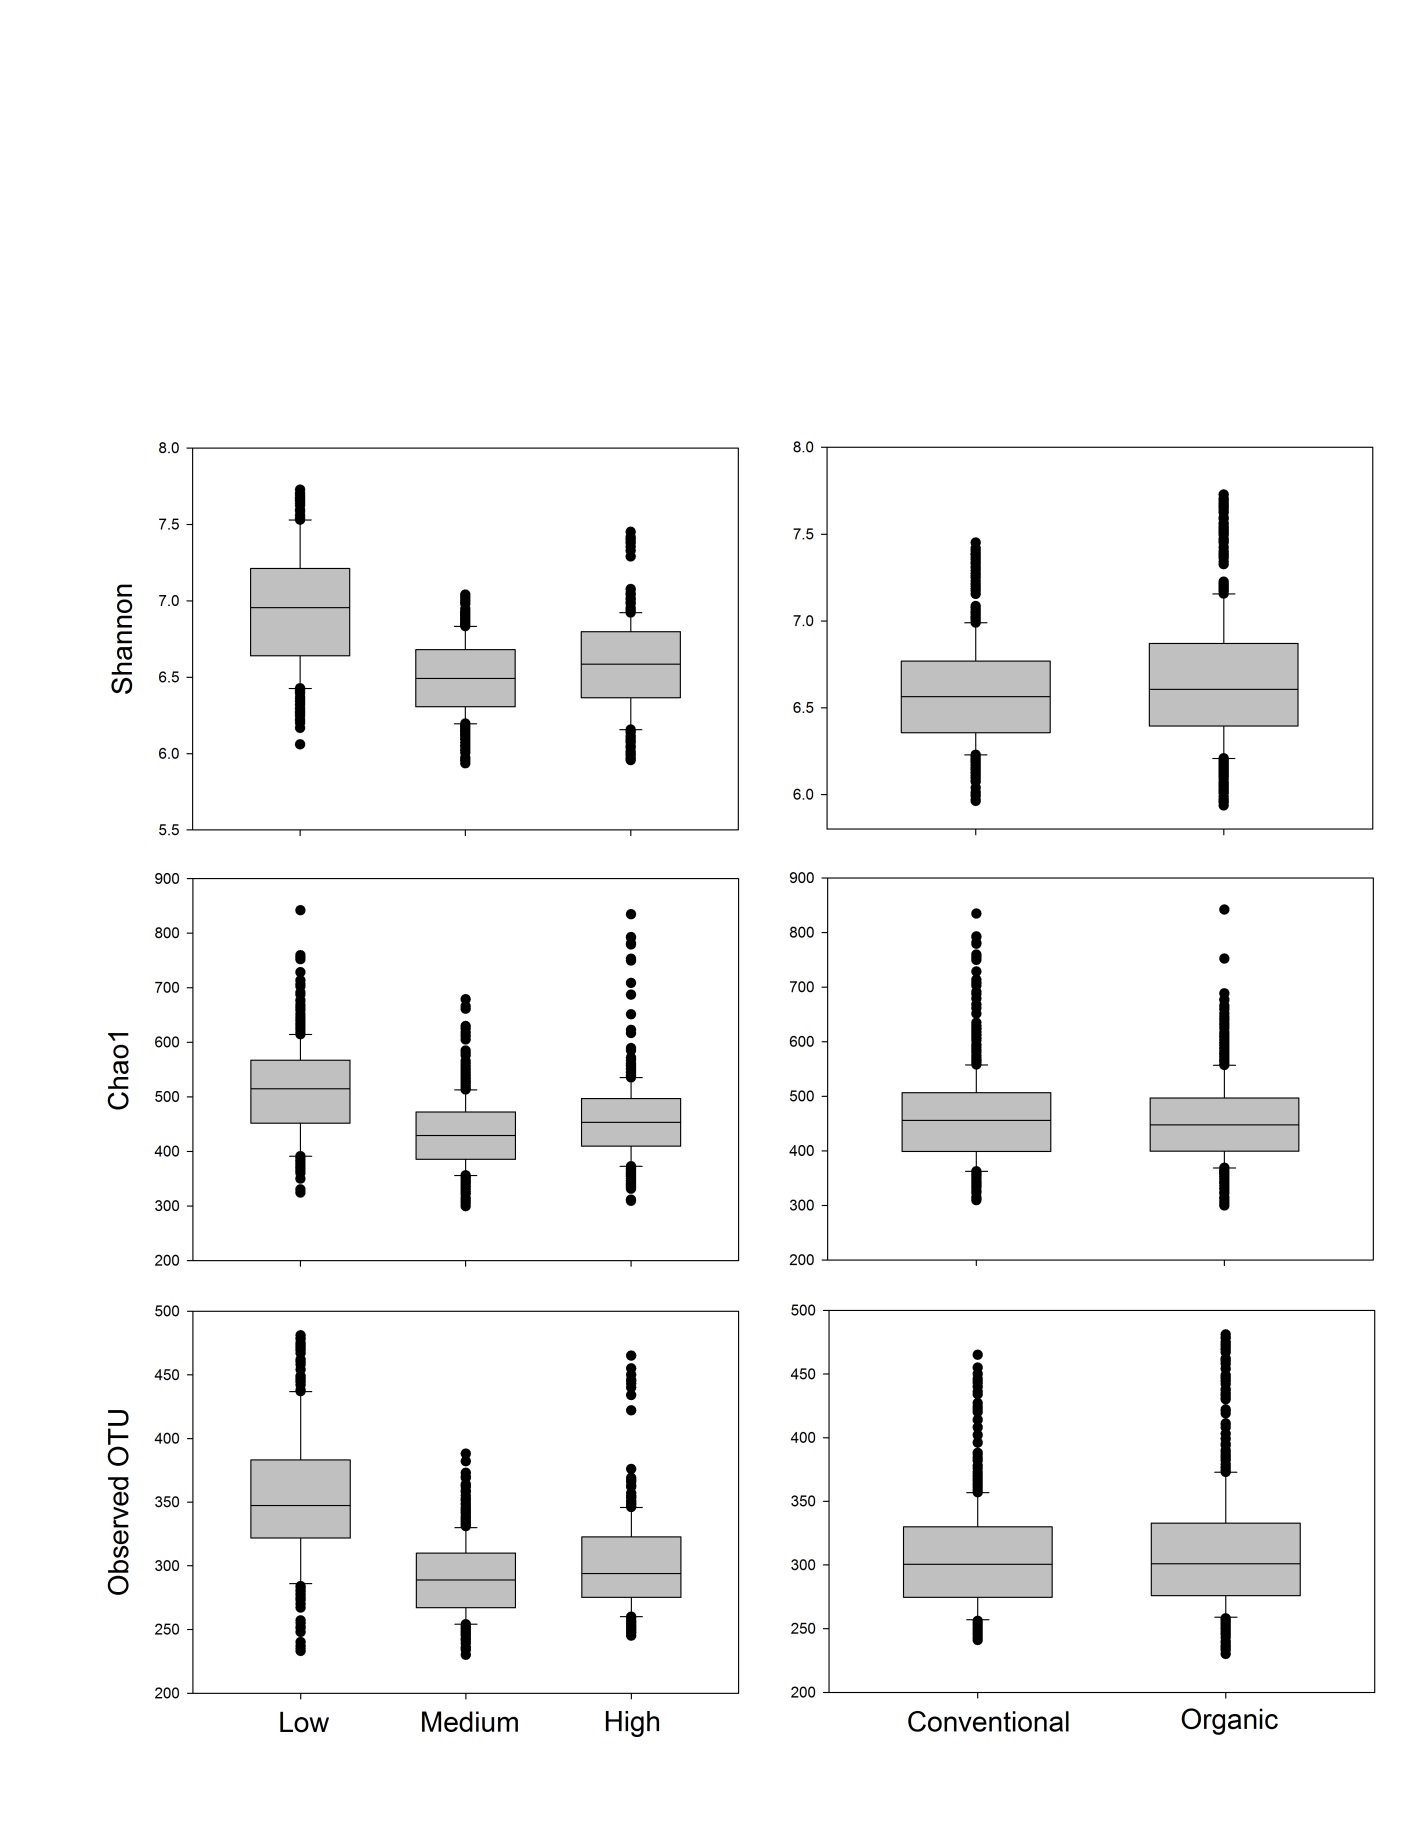


B

A

C

Table S1. Model performance summary. Models based on the entire dataset using Random Forest **(RF)** and Support Vector Regression **(SVR)** were compared with models based on Pearson correlation-filtered OTUs using Random Forest **(PRF)** and Support Vector Regression **(PSVR)**.

| Model | Mean squared error | r-value | R2 | *P* | Std Error | Slope | Intercept |
| --- | --- | --- | --- | --- | --- | --- | --- |
| RF | 0.035085143 | 0.540191305 | 0.291806646 | 0.00300388 | 0.048712439 | 0.159440341 | –0.24460554 |
| PRF | 0.022513 | 0.784516 | 0.615466 | 4.74E-07 | 0.064921 | 0.426778 | –0.152221 |
| SVR | 0.02816 | 0.643105 | 0.413584 | 0.000223 | 0.069274 | 0.296643 | –0.218219 |
| PSVR | 0.023963 | 0.730244 | 0.533257 | 0.000007 | 0.09851 | 0.54713 | –0.110781 |
